# Supplementary material
Source: PubMed Central journal article supplement (PMC8990194)
Supplement: bmjstel-2016-000130.supp1.pdf [file bmjstel-2016-000130.supp1.pdf]

## Supplemental Online Content

Table 1. List of Participating Sites

|                                                                                            | 2012<br>-<br>2013 | 2013<br>-<br>2014 |
|--------------------------------------------------------------------------------------------|-------------------|-------------------|
| N=                                                                                         | 33                | 27                |
| 1. Ann & Robert H. Lurie Children's Hospital of Chicago                                    | ✓                 | ✓                 |
| 2. Baylor College of Medicine / Texas Children's Hospital                                  |                   | ✓                 |
| 3. Children's Hospital at Montefiore                                                       | ✓                 | ✓                 |
| 4. Children's Hospital Los Angeles                                                         | ✓                 | ✓                 |
| 5. Children's Hospital of Philadelphia                                                     | ✓                 | ✓                 |
| 6. Children's Hospital of the King's Daughters (Eastern Virginia)                          | ✓                 | ✓                 |
| 7. Children's National Medical Center                                                      | ✓                 | ✓                 |
| 8. Cleveland Clinic Children's Hospital                                                    | ✓                 | ✓                 |
| 9. Cohen Children's Medical Center                                                         | ✓                 |                   |
| 10. Columbia University Medical Center / New York Presbyterian Hospital                    | ✓                 | ✓                 |
| 11. Dell Children's Medical Center of Central Texas                                        | ✓                 | ✓                 |
| 12. Emory University School of Medicine                                                    | ✓                 | ✓                 |
| 13. Inova-Fairfax Children's Hospital                                                      | ✓                 | ✓                 |
| 14. Jacobi Medical Center                                                                  | ✓                 |                   |
| 15. Medical College of Georgia at Georgia Regents University                               | ✓                 | ✓                 |
| 16. Nationwide Children's Hospital                                                         | ✓                 | ✓                 |
| 17. Nemours / Alfred Dupont Hospital for Children                                          | ✓                 | ✓                 |
| 18. Rutgers Robert Wood Johnson Medical School                                             | ✓                 | ✓                 |
| 19. Saint Louis University/Cardinal Glennon Children's Medical Center                      | ✓                 | ✓                 |
| 20. Seattle Children's Hospital                                                            | ✓                 |                   |
| 21. Stony Brook Children's Hospital                                                        | ✓                 | ✓                 |
| 22. The Brooklyn Hospital Center                                                           | ✓                 |                   |
| 23. Tufts Medical Center / Floating Hospital for Children                                  | ✓                 | ✓                 |
| 24. University of Alabama at Birmingham / Children's of Alabama                            | ✓                 | ✓                 |
| 25. University of Chicago Medicine / Comer Children's Hospital                             | ✓                 | ✓                 |
| 26. University of Illinois College of Medicine at Peoria / Children's Hospital of Illinois | ✓                 | ✓                 |
| 27. University of Iowa Children's Hospital                                                 | ✓                 |                   |
| 28. University of Kentucky / Kentucky Children's Hospital                                  |                   | ✓                 |
| 29. University of Pittsburgh Medical Center / Children's Hospital of Pittsburgh            | ✓                 | ✓                 |
| 30. University of Rochester Medical Center                                                 | ✓                 | ✓                 |
| 31. University of Tennessee Health Science Center / Le Bonheur Children's Hospital         | ✓                 | ✓                 |

|                                                     |   |   |
|-----------------------------------------------------|---|---|
| 32. University of Texas Southwestern Medical Center | ✓ |   |
| 33. University of Wisconsin School of Medicine      | ✓ |   |
| 34. Weill Cornell Medical College                   | ✓ |   |
| 35. Yale University School of Medicine              | ✓ | ✓ |
